# Supplementary material for: The Dynamics of the Bacterial Community of the Photobioreactor-Cultivated Green Microalga Haematococcus lacustris during Stress-Induced Astaxanthin Accumulation
Source: MDPI journal article supplement (doi:10.3390/biology10020115), 2021-02-04
Supplement: s1 [file s1]

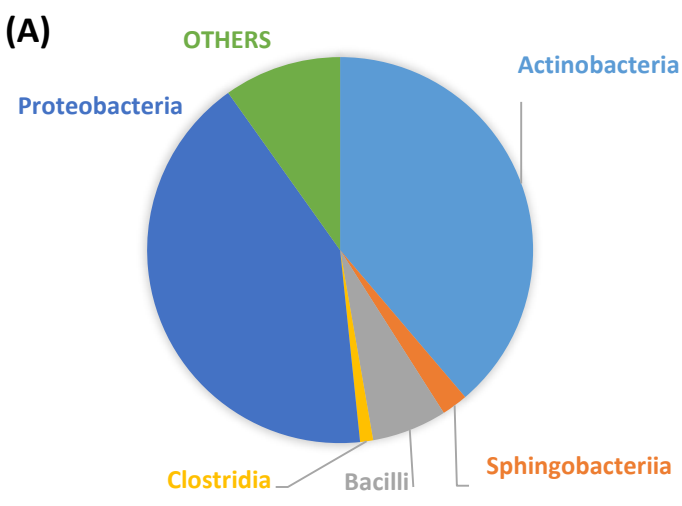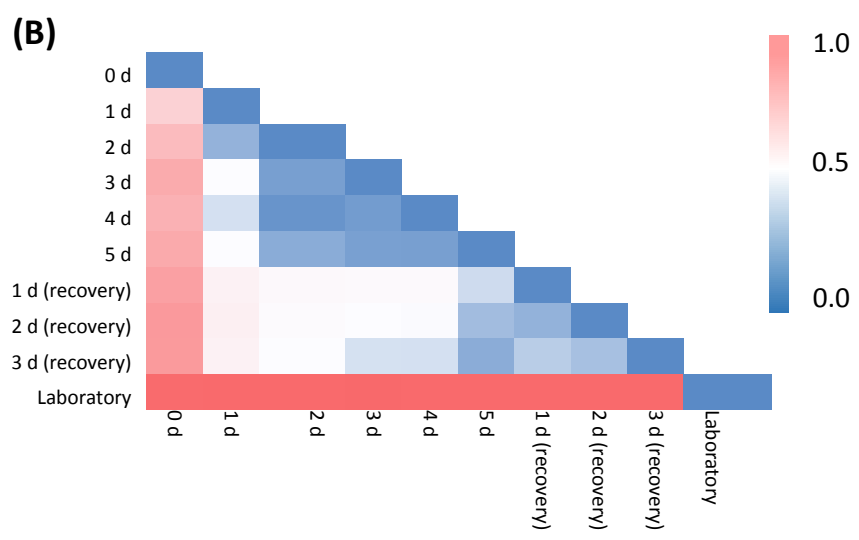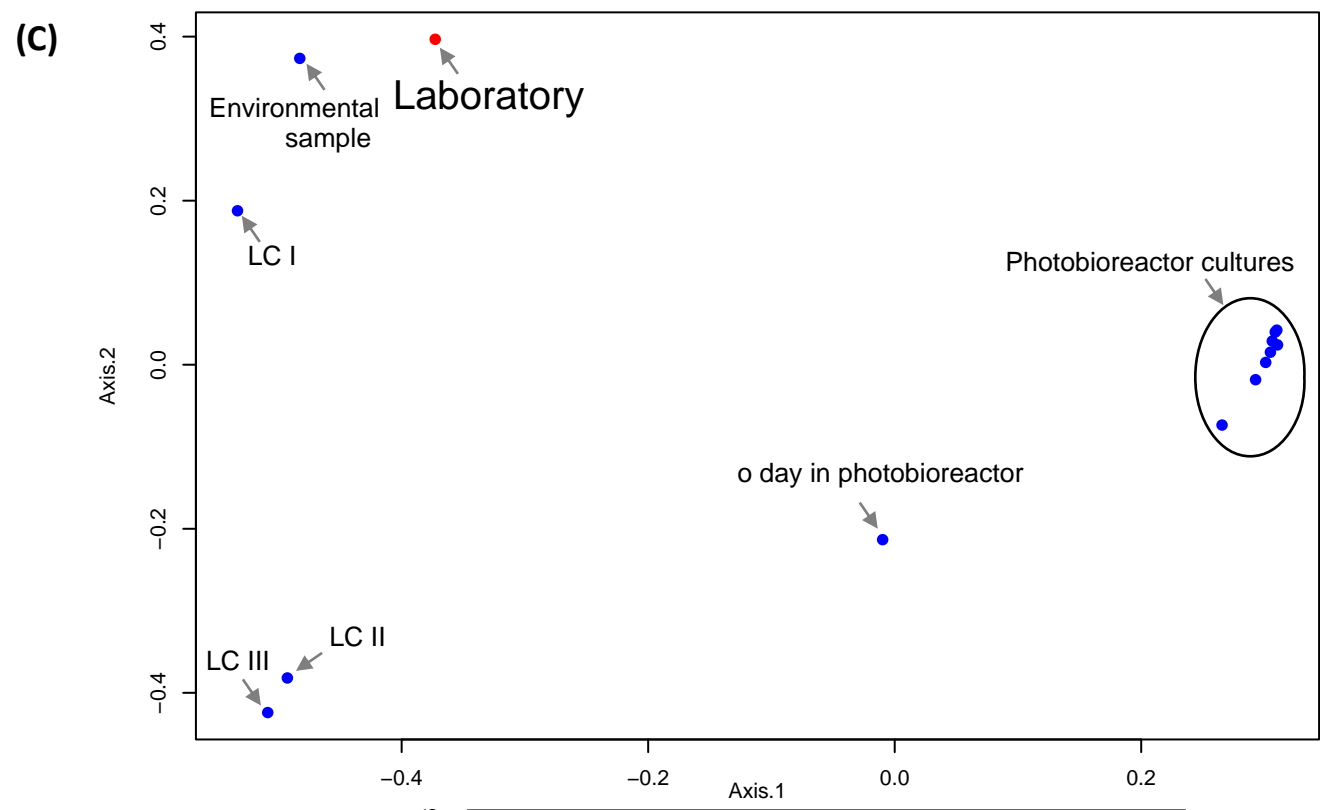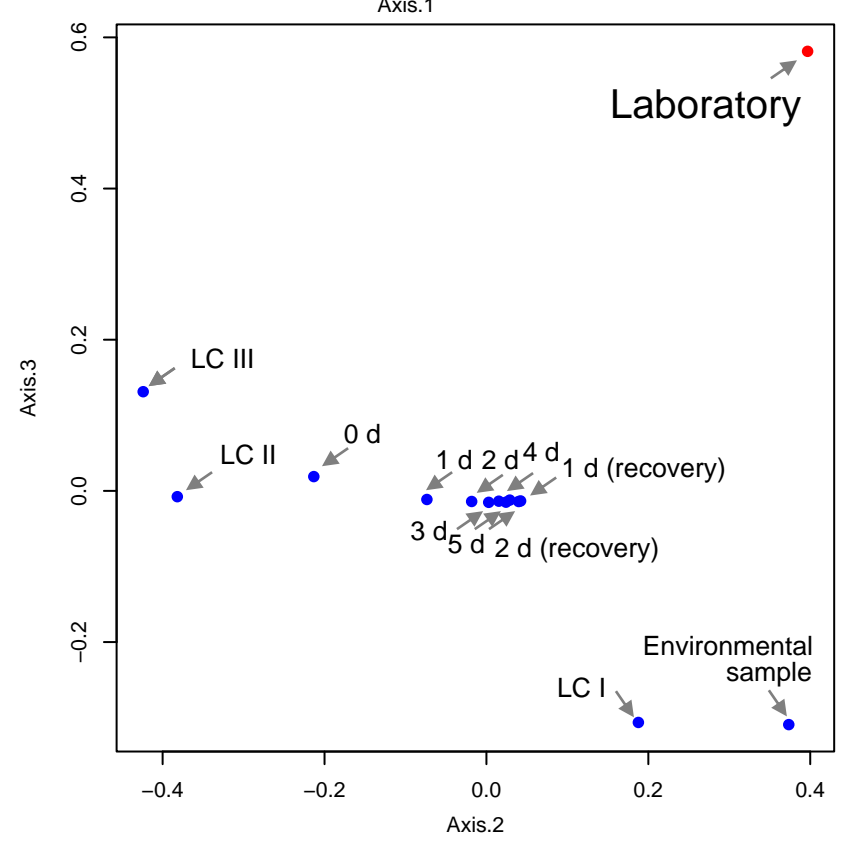

**Fig. S4.** Taxonomical composition of bacterial community at the level of phylum in the laboratory, where *H. lacustris* BM1 was cultured **(A)**. The heatmap of the Morisita-Horn index values at the genus level reflecting similarity of the *16SrRNA* gene libraries obtained for the *H. lacustris*-bacterial association at different stages of the experiment, as well as with the dataset from the laboratory **(B)**. projection of the space of three components on the plain of 1st and 2nd components and on the plain of 2nd and 3th components. Samples from photobioreactor, LC-I, LC-II, LC-III (the laboratory *H. lacustris* cultures maintained after isolation), ‘environment sample’ as well as laboratory sample are presented **(C)**.

**Table S4.** Total list of bacterial genera observed in the laboratory, where *H. lacustris* BM1 (IPPAS H-2018) was cultured based on sequencing of *16SrRNA* gene fragment. The percentages of total bacterial reads in each are presented.

| Phylum           | Family                      | Genus                    | Reads percentage |
|------------------|-----------------------------|--------------------------|------------------|
| Actinobacteria   | <i>Corynebacteriaceae</i>   | <i>Corynebacterium</i>   | 1.24             |
|                  | <i>Micrococcaceae</i>       | <i>Micrococcus</i>       | 3.49             |
|                  |                             | <i>Rothia</i>            | 1.08             |
|                  | <i>Propionibacteriaceae</i> | <i>Propionibacterium</i> | 28.52            |
|                  | OTHERS                      |                          | 4.45             |
| Sphingobacteriia | OTHERS                      |                          | 2.20             |
| Bacilli          | <i>Staphylococcaceae</i>    | <i>Macrococcus</i>       | 3.48             |
|                  |                             | <i>Staphylococcus</i>    | 1.42             |
|                  | <i>Streptococcaceae</i>     | <i>Streptococcus</i>     | 1.38             |
| Clostridia       | <i>Ruminococcaceae</i>      | <i>Ruminococcus</i>      | 0.31             |
|                  |                             | <i>Subdoligranulum</i>   | 0.47             |
|                  |                             | OTHERS                   | 0.31             |
| Proteobacteria   | <i>Caulobacteraceae</i>     | <i>Brevundimonas</i>     | 0.78             |
|                  | <i>Bradyrhizobiaceae</i>    | <i>Bosea</i>             | 0.28             |
|                  |                             | <i>Bradyrhizobium</i>    | 0.47             |
|                  | <i>Phyllobacteriaceae</i>   | <i>Mesorhizobium</i>     | 0.45             |
|                  | <i>Rhizobiaceae</i>         | <i>Ensifer</i>           | 2.53             |
|                  | <i>Alcaligenaceae</i>       | <i>Achromobacter</i>     | 0.04             |
|                  | <i>Comamonadaceae</i>       | OTHERS                   | 2.28             |
|                  | <i>Pasteurellaceae</i>      | <i>Haemophilus</i>       | 1.30             |
|                  | <i>Moraxellaceae</i>        | <i>Acinetobacter</i>     | 3.62             |
|                  |                             | <i>Enhydrobacter</i>     | 1.19             |
|                  |                             | <i>Psychrobacter</i>     | 1.11             |
|                  | <i>Pseudomonadaceae</i>     | <i>Pseudomonas</i>       | 2.74             |
|                  | <i>Vibrionaceae</i>         | OTHERS                   | 17.98            |
|                  | <i>Xanthomonadaceae</i>     | OTHERS                   | 0.91             |
|                  | OTHERS                      |                          | 6.12             |
| OTHERS           |                             |                          | 9.85             |
