# Supplementary material for: The Dynamics of the Bacterial Community of the Photobioreactor-Cultivated Green Microalga Haematococcus lacustris during Stress-Induced Astaxanthin Accumulation
Source: Biology (Basel). 2021 Feb 4;10(2):115. doi: 10.3390/biology10020115 (PMC7915213; doi:10.3390/biology10020115)
Supplement: Supplementary file 1 [file biology-10-00115-s001.zip]

Archive with 4 entries (4 files):
- Supplementary/S4.pdf
- Supplementary/Table s1.docx
- Supplementary/Table s2.docx
- Supplementary/Table s3.docx
