# Supplementary material for: The Dynamics of the Bacterial Community of the Photobioreactor-Cultivated Green Microalga Haematococcus lacustris during Stress-Induced Astaxanthin Accumulation
Source: Biology (Basel). 2021 Feb 4;10(2):115. doi: 10.3390/biology10020115 (PMC7915213; doi:10.3390/biology10020115)
Supplement: Supplementary file 1 [file biology-10-00115-s001.zip › Supplementary/Table s2.docx]

| **Sample** | **Observed richness** | **NACE** | **NChao-1** | ***H*** | ***d*** |  |
| --- | --- | --- | --- | --- | --- | --- |
| 0 d | 18 | 18 | 18 | 3.24 | 0.85 |  |
| 1 d | 18 | 18 | 18 | 2.84 | 0.81 |  |
| 2 d | 18 | 18 | 18 | 2.66 | 0.77 |  |
| 3 d | 18 | 18 | 18 | 2.48 | 0.72 |  |
| 4 d | 18 | 18 | 18 | 2.47 | 0.73 |  |
| 5 d | 18 | 18 | 18 | 2.68 | 0.75 |  |
| 1 d (recovery) | 18 | 18 | 18 | 2.72 | 0.77 |  |
| 2 d (recovery) | 18 | 18 | 18 | 2.54 | 0.71 |  |
| 3 d (recovery) | 18 | 18 | 18 | 2.57 | 0.70 |  |

Table S1. The parameters of α-diversity calculated at family level for the samples collected each day during astaxanthin synthesis induction in the *H. lacustris* BM1 (IPPAS H-2018) culture as well as during recovery of the culture under the vegetative growth conditions: ACE (NACE and Chao-1 (NChao-1) abundance estimators, Shannon entropy index (*H*), and reverse Simpson index (*d*). The taxa with the abundance lower than 1% reads were not taken into account.
